# Supplementary material
Source: ML conference proceedings conference paper supplement (https://aclanthology.org/P18-1136)

COR: the closest parking\_garage is civic.center\_garage located 4\_miles away at 270\_altaire\_walk  
GEN: the closest parking\_garage is civic.center\_garage at 270\_altaire\_walk 4\_miles away through the directions

Memory Content

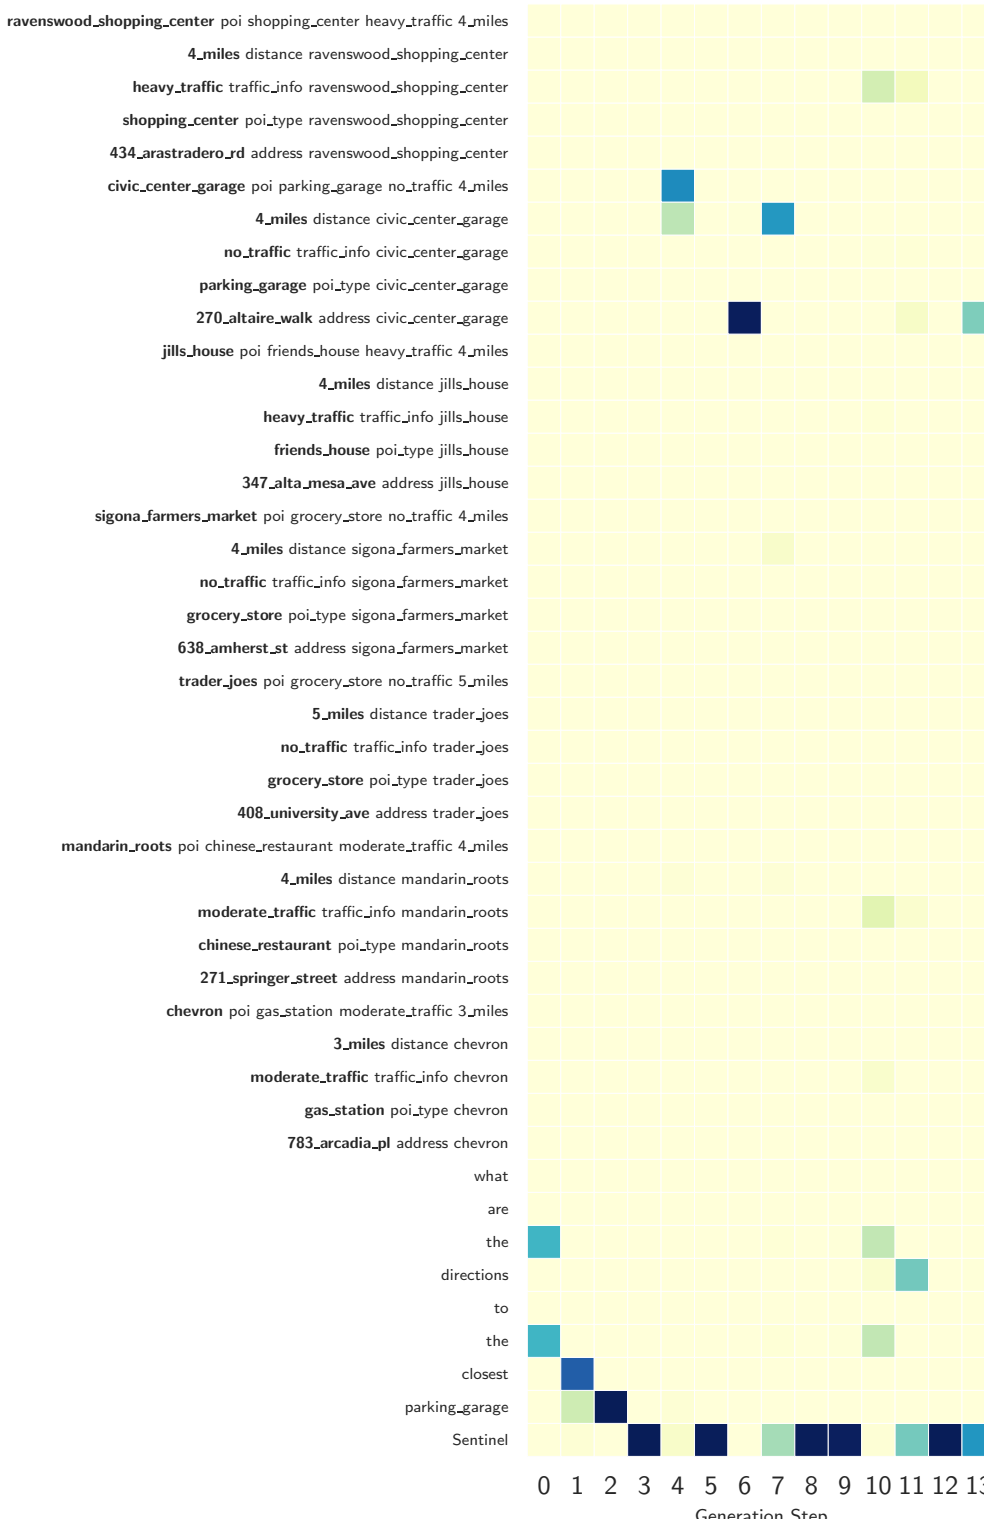

Supplement: Notes [file VIZ_MEMTINCAR.pdf › mem2seq-supplemental-material/VIZ_MEMTINCAR.pdf]
