# Supplementary material
Source: ML conference proceedings conference paper supplement (https://aclanthology.org/P18-1136)

COR: api\_call italian london eight expensive  
GEN: api\_call italian london eight expensive

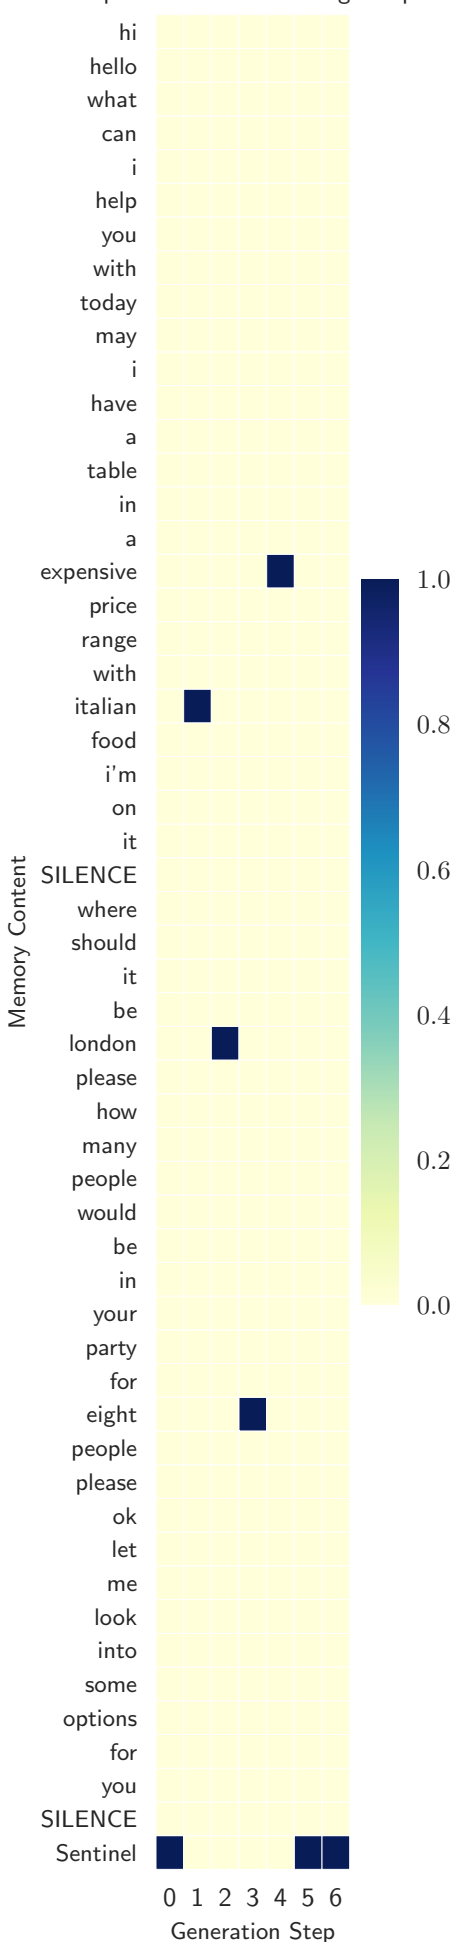

Supplement: Notes [file VIZ_MEMT1_NEW.pdf › mem2seq-supplemental-material/VIZ_MEMT1_NEW.pdf]
